# Supplementary material for: Synthesis, characterization and antimicrobial activities of water-soluble amphiphilic copolymers containing ciprofloxacin and quaternary ammonium salts
Source: Royal Society of Chemistry journal article supplement (doi:10.1039/c5tb00029g), 2015-01-01
Supplement: c5tb00029g1.pdf [file c5tb00029g1.pdf]

## Supporting Information

### **Synthesis, Characterization and Antimicrobial Activities of Water-Soluble Amphiphilic Copolymers Containing Ciprofloxacin and Quaternary Ammonium Salts**

**Man He,<sup>a,b</sup> Huining Xiao,<sup>\*a</sup> Yuming Zhou<sup>b</sup> and Peng Lu<sup>a</sup>**

<sup>a</sup> Department of Chemical Engineering & Limerick Pulp and Paper  
Centre, University of New Brunswick, Fredericton, NB E3B 5A3,  
Canada

<sup>b</sup> School of Chemistry and Chemical Engineering, Southeast University,  
Nanjing 211189, China

Correspondence to: H. Xiao (E-mail: hxiao@unb.ca)

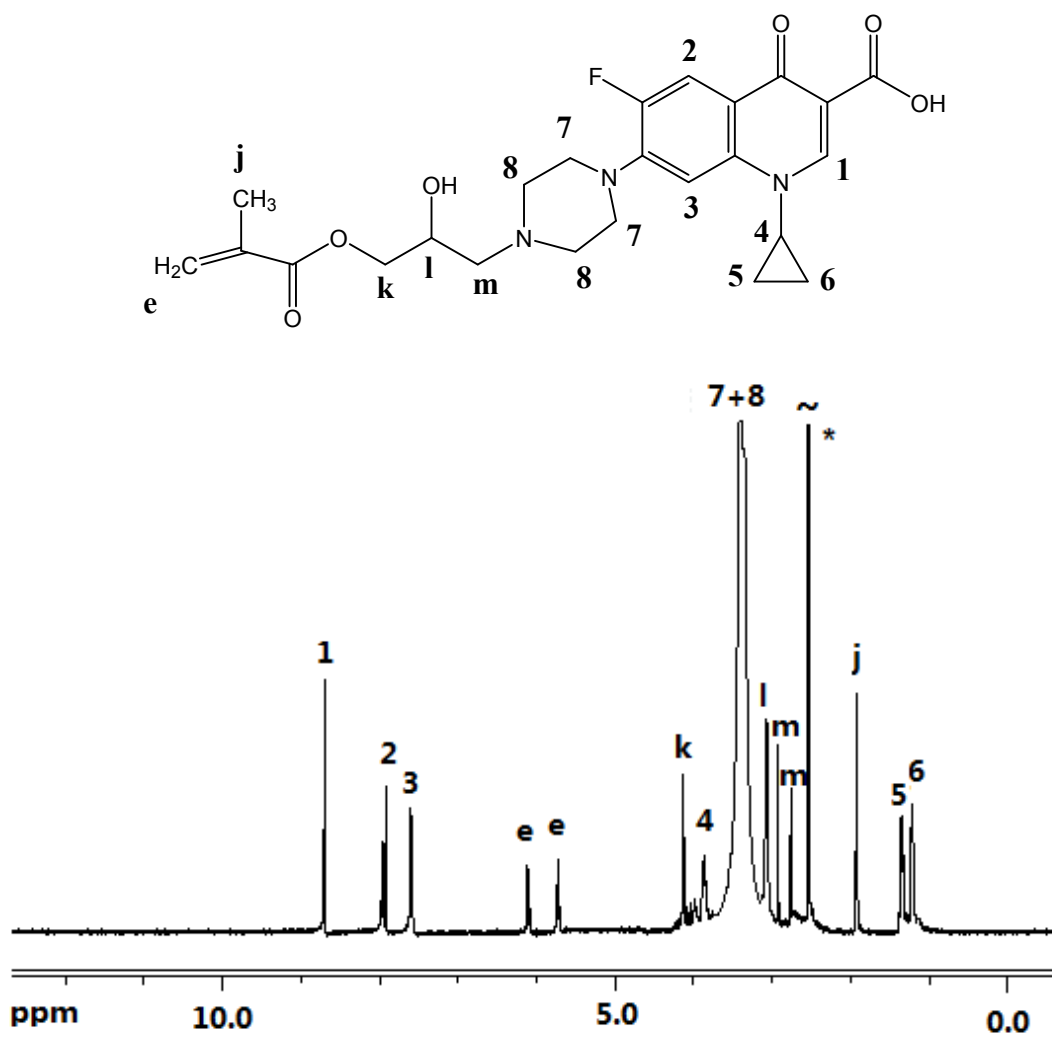

Figure S1. <sup>1</sup>H-NMR spectrum of GMA-CPF

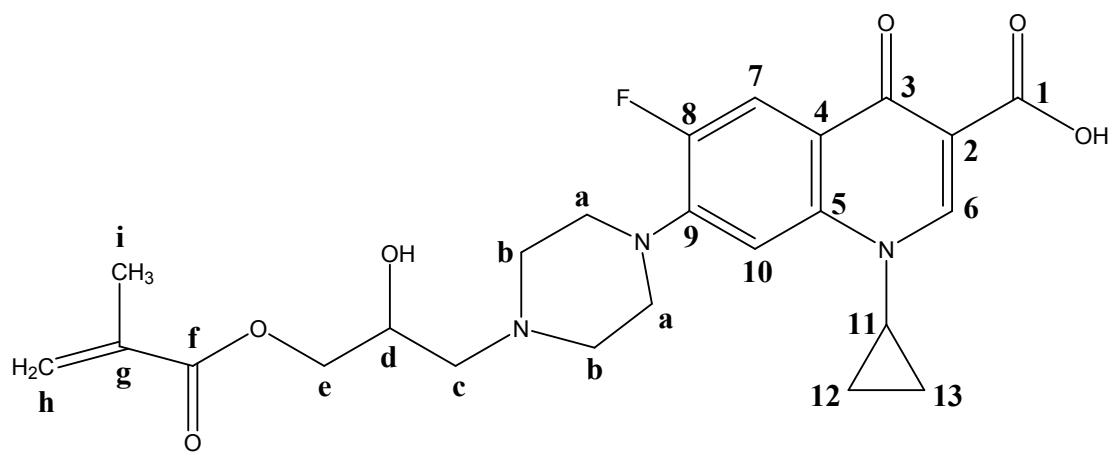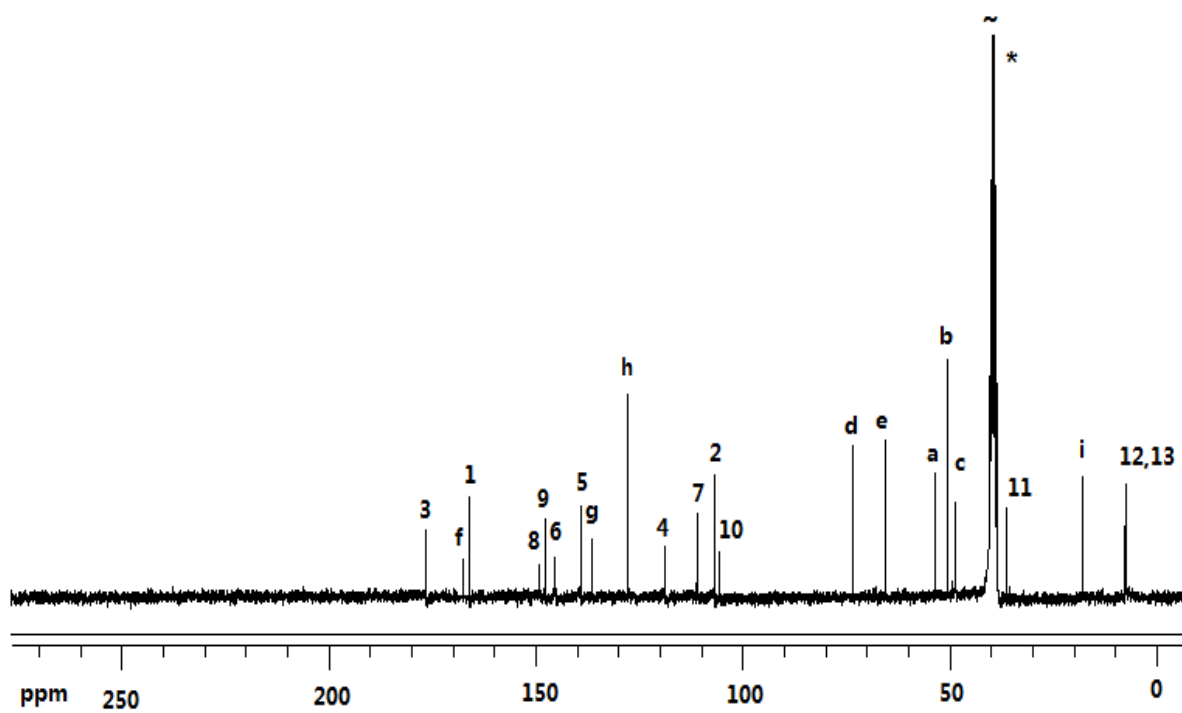

Figure S2. <sup>13</sup>C-NMR spectrum of GMA-CPF

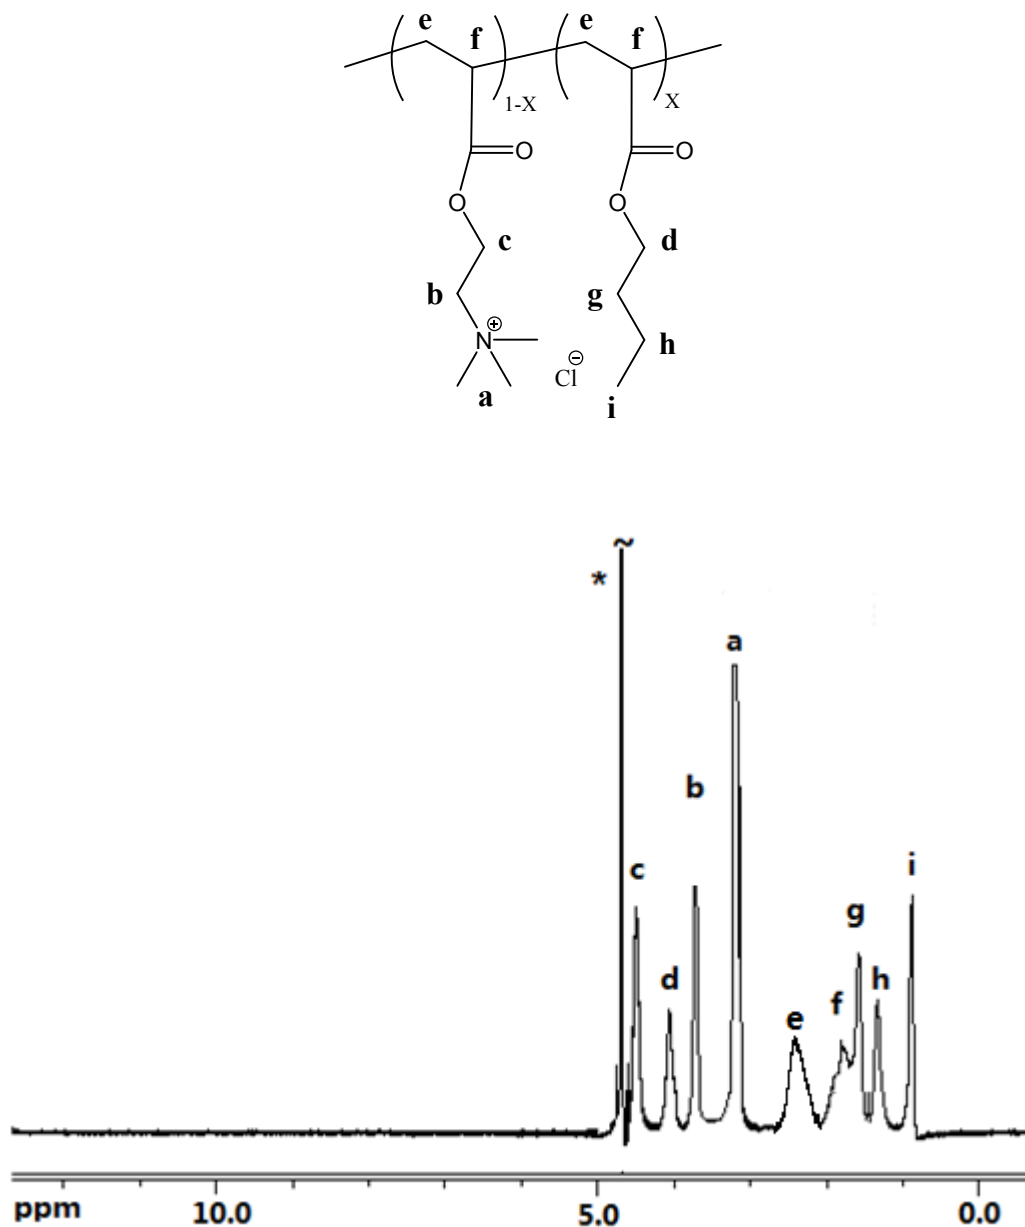

Figure S3.  $^1\text{H-NMR}$  spectrum of DMAEAMC/BA copolymer; (1-x): x=59: 41

The copolymer compositions for this system were determined by  $^1\text{H-NMR}$  spectroscopy analysis. The  $^1\text{H-NMR}$  peak at 3.10 ppm (Figure S3, a) corresponds to the methyl group of DMAEAMC; the peak at 1.32 ppm (Figure S3, h) corresponds to the methylene group,  $-\text{O}-(\text{CH}_2)_2\text{CH}_2\text{CH}_3$ , in the BA side chain. Let  $m_1$  be the mole fraction of DMAEAMC and  $m_2 = (1-m_1)$  that of the BA unit.

$$\frac{\text{Area}_{3.10\text{ppm}}}{\text{Area}_{1.32\text{ppm}}} = \frac{9m_1}{2m_2} = C_1 \quad \text{Equation 1a}$$

Where  $\text{Area}_{3.10\text{ppm}}$ =area of the peak at 3.10ppm and  $\text{Area}_{1.32\text{ppm}}$ =area of the peak at 1.32ppm.

On simplification,

$$m_1 = \frac{2C_1}{2C_1 + 9} \quad \text{Equation 1b}$$

Where  $m_1$  and  $m_2$  are the copolymer molar compositions. The results are presented in Table 1, which are in agreement with the values calculated by apparent charge density.

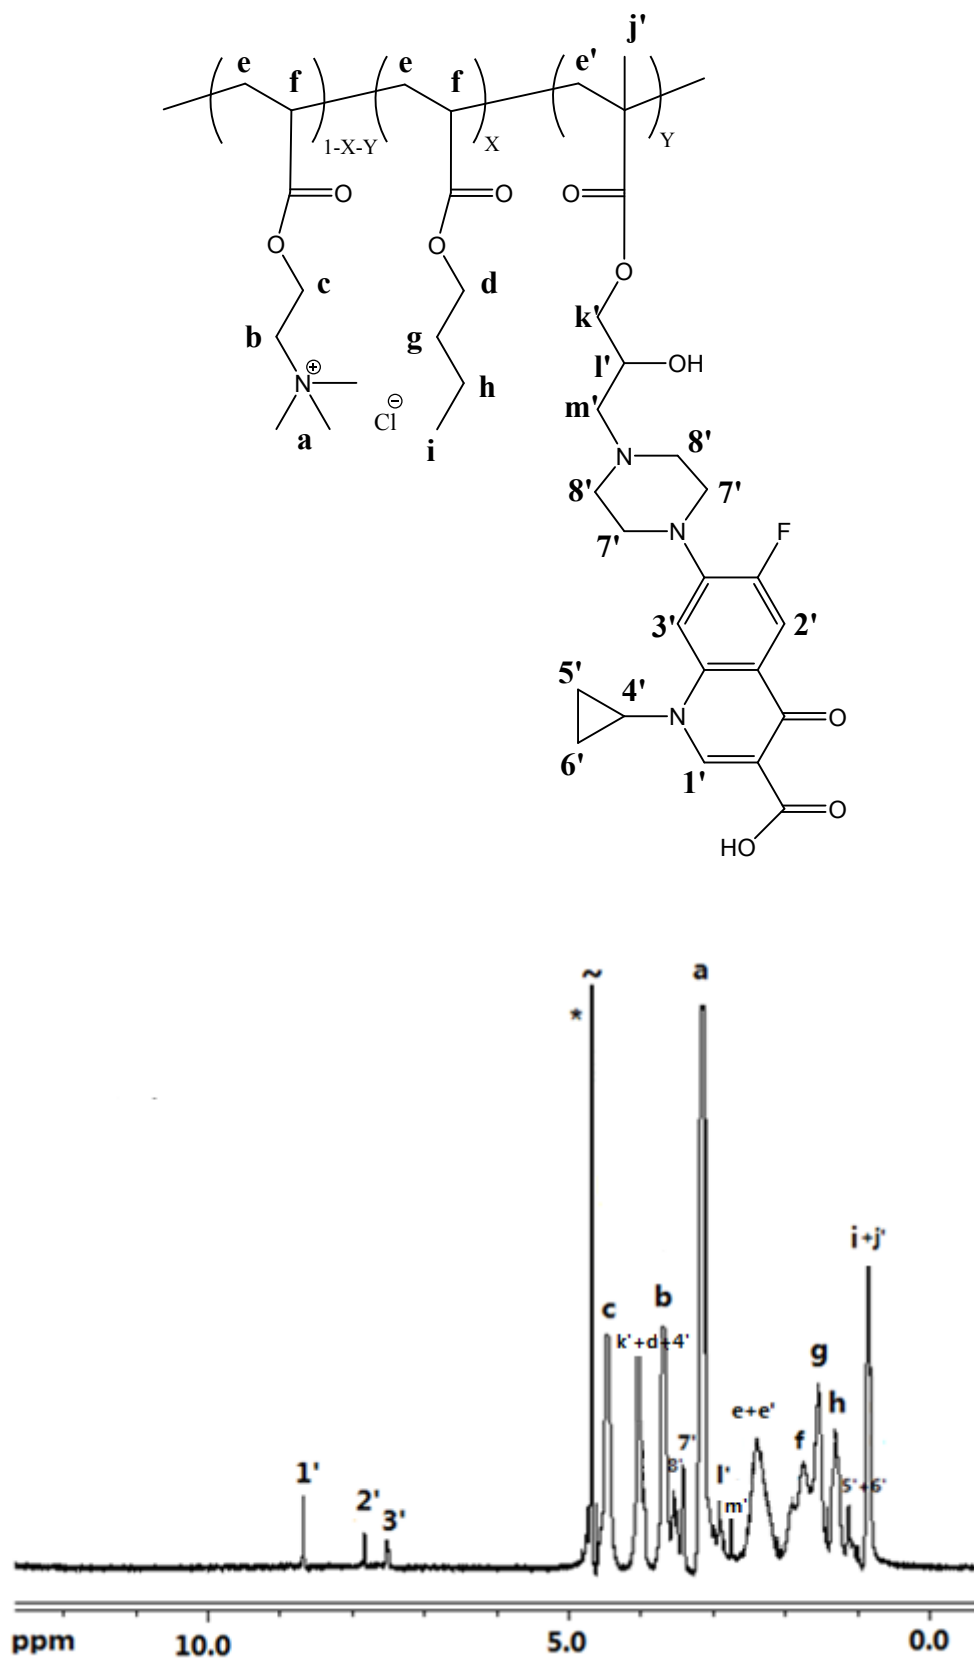

Figure S4. <sup>1</sup>H-NMR spectrum of DMAEAMC/BA/GMA-CPF copolymer; (1-x-y): x:  
y=52.8: 42.9: 4.3  
The copolymer compositions for this system were determined by <sup>1</sup>H-NMR

spectroscopy analysis. The  $^1\text{H-NMR}$  peak at 3.10 ppm (Figure S4, a) corresponds to the methyl group of DMAEAMC; the peak at 1.32 ppm (Figure S4, h) corresponds to the methylene group,  $-\text{O}-(\text{CH}_2)_2\text{CH}_2\text{CH}_3$ , in the BA side chain; the peaks at 0.85 ppm (Figure S4, i+j') are the methyl group for BA and GMA-CPF. Considering the mole fraction of DMAEAMC as  $m_1$ , the mole fraction of BA as  $m_2$ , and  $m_3 = (1-m_1-m_2)$  that of the GMA-CPF unit.

$$\frac{\text{Area}_{3.10\text{ppm}}}{\text{Area}_{1.32\text{ppm}}} = \frac{9m_1}{2m_2} = C_1 \quad \text{Equation 2a}$$

$$\frac{\text{Area}_{1.32\text{ppm}}}{\text{Area}_{0.85\text{ppm}}} = \frac{2m_2}{3m_2 + 3m_3} = C_2 \quad \text{Equation 2b}$$

Where  $\text{Area}_{3.10\text{ppm}}$ =area of the peak at 3.10ppm,  $\text{Area}_{1.32\text{ppm}}$ =area of the peak at 1.32ppm, and  $\text{Area}_{0.85\text{ppm}}$ =area of the peak at 0.85ppm.

On simplification,

$$m_1 = \frac{C_1 C_2}{C_1 C_2 + 3} \quad \text{Equation 2c}$$

$$m_2 = \frac{9C_1}{2C_1 C_2 + 6} \quad \text{Equation 2d}$$

$$m_3 = \frac{6 - 9C_1}{2C_1 C_2 + 6} \quad \text{Equation 2e}$$

Where  $m_1$ ,  $m_2$ , and  $m_3$  are the copolymer molar compositions. The results are presented in Table 1, which are in agreement with the values calculated by apparent charge density and UV measurements.
